# Supplementary material
Source: Springer Nature journal article supplement (https://www.springermedizin.de/resource/supplementary/12885_2011_2737_MOESM2_ESM.pdf/9461830)
Supplement: MOESM2 [file 9461830]

# Randomisation of Urologists

Survivors of Prostate Cancer Present for  
Follow up Consultation

**Intervention: Physical Activity Group**

**Control Group**

**Recruitment**

**Recruitment**

**Baseline questionnaire**

**Baseline session: Fitness Assessment &  
Physical Activity (PA) Measures**

**Baseline session: Fitness Assessment &  
Physical Activity (PA) Measures**

**12 week program : 2 gym sessions and  
1 home session each week**

**12-week follow up fitness assessment and questionnaire**

**6-month follow up questionnaire**

**12-month follow up telephone questionnaire**
